# Supplementary material for: Ag8SnS6: a new IR solar absorber material with a near optimal bandgap
Source: Royal Society of Chemistry journal article supplement (doi:10.1039/c8ra08734b), 2018-01-01
Supplement: c8ra08734b1.pdf [file c8ra08734b1.pdf]

## Supplementary Information

### Ag<sub>8</sub>SnS<sub>6</sub>: a new IR Solar Absorber Material with a near Optimal Bandgap

Patsorn Boon-on,<sup>a</sup> Belete Asefa Aragaw<sup>a,b</sup>, Chun-Yen Lee,<sup>a</sup> Jen-Bin Shi<sup>c</sup>  
and Ming-Way Lee<sup>a,1</sup>

*<sup>a</sup>Institute of Nanoscience and Department of Physics, National Chung  
Hsing University, Taichung 402, Taiwan*

*<sup>b</sup>Department of Chemistry, Bahir Dar University, P.O. Box 79, Bahir Dar,  
Ethiopia*

*<sup>c</sup>Department of Electronic Engineering, Feng Chia University, Taichung,  
40724, Taiwan*

---

<sup>1</sup> Corresponding author e-mail: mwl@phys.nchu.edu.tw

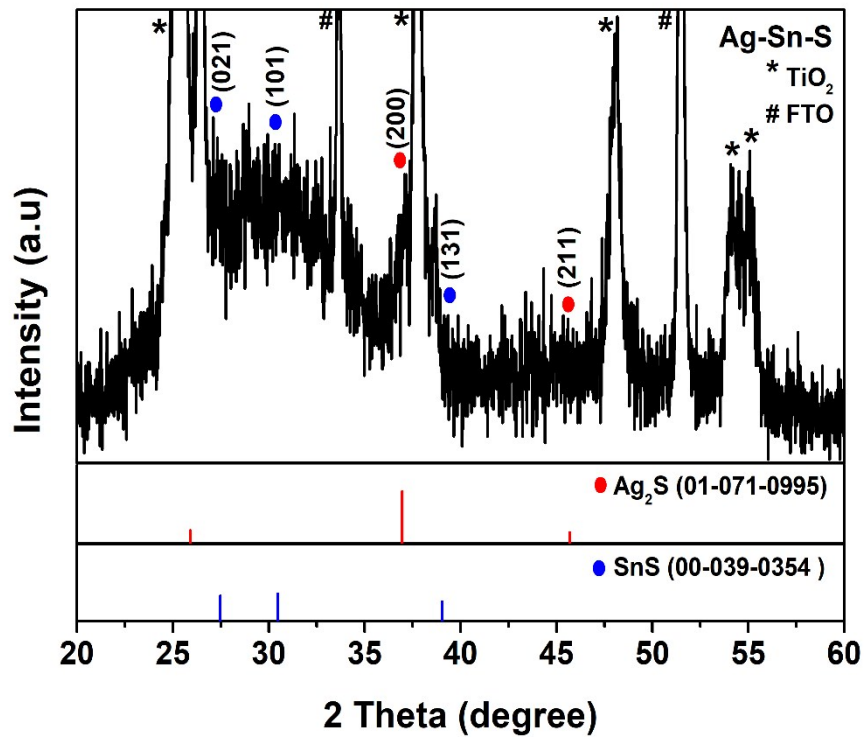

Fig. S1 XRD pattern of Ag-Sn-S sample before heat treatment. The material is mostly amorphous. Only a weak Ag<sub>2</sub>S peak at 37° corresponding to the (200) plane is observed.
